# Supplementary material
Source: PubMed Central journal article supplement (PMC3312388)
Supplement: NIHMS361277-supplement-Supplementary_Data.pdf [file NIHMS361277-supplement-Supplementary_Data.pdf]

## Supporting Information

# Phosphorylation but not Alternative Splicing nor Proteolytic Degradation Is Conserved in Human and Mouse Cardiac Troponin T

*Jiang Zhang,<sup>a,b</sup> Han Zhang,<sup>a</sup> Serife Ayaz-Guner,<sup>a</sup> Yi-chen Chen,<sup>a</sup> Xintong Dong,<sup>a</sup> Qingge Xu,<sup>a, c</sup>*

*Ying Ge<sup>a,c</sup> \**

<sup>a</sup> Human Proteomics Program, School of Medicine and Public Health, <sup>b</sup> School of Pharmacy,

<sup>c</sup> Department of Cell and Regenerative Biology, School of Medicine and Public Health,

University of Wisconsin-Madison, Madison, WI, 53706, USA

Running title: Top-Down Mass Spectrometry of Human and Mouse Cardiac Troponin T

\*Corresponding author:

Dr. Ying Ge, Human Proteomics Program and Department of Cell and Regenerative Biology,  
School of Medicine and Public Health, University of Wisconsin-Madison, 1300 University  
Ave., SMI 130, Madison, WI, 53706, USA. Tel: (+1) 608-263-9212, Fax: (+1) 608-265-5512,  
E-mail: ge2@wisc.edu

## Supplemental Figures

|     | Exon                                                                        | 2   | 3         | 4           | 5 (Fetal) | 6  | 7  | 8 |     |           |             |
|-----|-----------------------------------------------------------------------------|-----|-----------|-------------|-----------|----|----|---|-----|-----------|-------------|
| 1   | MSDIEEVVVEEYEEEEQEAAVVEEEDWREDEDEQEAAEEDAEEAEAEETEETRAEEDDEEEEAKEAEDGPM     |     |           |             |           |    |    |   | 70  | P45379    | TNNT2_HUMAN |
| 1   | MSDIEEVVVEEYEEEEQEAAVVEE-----QEAAEEDAEEAEAEETEETRAEEDDEEEEAKEAEDGPM         |     |           |             |           |    |    |   | 60  | P45379-6  | TNNT2_HUMAN |
| 1   | MSDIEEVVVEEYEEEEQEAAVVEE-DWREDEDEQEAAEEDAEEAEAEETEETRAEEDDEEEEAKEAEDGPM     |     |           |             |           |    |    |   | 69  | P45379-2  | TNNT2_HUMAN |
| 1   | MSDIEEVVVEEYEEEEQEE-----QEAAEEDAEEAEAEETEETRAEEDDEEEEAKEAEDGPM              |     |           |             |           |    |    |   | 55  | P45379-7  | TNNT2_HUMAN |
| 1   | MSDIEEVVVEEYEEEEQEAAVVEEEDWREDEDEQEAAEEDAEEAEAEETEETRAE-DEEEEAKEAEDGPM      |     |           |             |           |    |    |   | 69  | P45379-3  | TNNT2_HUMAN |
| 1   | MSDIEEVVVEEYEEEEQEAAVVEEEDWREDEDEQEAAEEDAEEAEAEETEETRAEEDDEEEEAKEAEDGPM     |     |           |             |           |    |    |   | 70  | P45379-10 | TNNT2_HUMAN |
| 1   | MSDIEEVVVEEYEEEEQEAAVVEE-DWREDEDEQEAAEEDAEEAEAEETEETRAE-DEEEEAKEAEDGPM      |     |           |             |           |    |    |   | 68  | P45379-4  | TNNT2_HUMAN |
| 1   | MSDIEEVVVEEYEEEEQEAAVVEE-----DWREDEDEQEAAEEDAEEAEAEETEETRAEEDDEEEEAKEAEDGPM |     |           |             |           |    |    |   | 65  | P45379-8  | TNNT2_HUMAN |
| 1   | MSDIEEVVVEEYEEEEQEAAVVEEEDWREDEDEQEAAEEDAEEAEAEETEETRAEEDDEEEEAKEAEDGPM     |     |           |             |           |    |    |   | 70  | P45379-5  | TNNT2_HUMAN |
| 1   | MSDIEEVVVEEYEEEEQEAAVVEEEDWREDEDEQEAAEEDAEEAEAEETEETRAEEDDEEEEAKEAEDGPM     |     |           |             |           |    |    |   | 70  | P45379-9  | TNNT2_HUMAN |
|     |                                                                             | 8   | 9         |             | 10        |    | 11 |   |     |           |             |
| 71  | EEKPKPRSFMPNLPVPPKIPDGERVDFDIHRKRMEKDLNELQALIEAHFENRKKKEEELVSLKDRERR        |     |           |             |           |    |    |   | 140 | P45379    | TNNT2_HUMAN |
| 61  | EEKPKPRSFMPNLPVPPKIPDGERVDFDIHRKRMEKDLNELQALIEAHFENRKKKEEELVSLKDRERR        |     |           |             |           |    |    |   | 130 | P45379-6  | TNNT2_HUMAN |
| 70  | EEKPKPRSFMPNLPVPPKIPDGERVDFDIHRKRMEKDLNELQALIEAHFENRKKKEEELVSLKDRERR        |     |           |             |           |    |    |   | 139 | P45379-2  | TNNT2_HUMAN |
| 56  | EEKPKPRSFMPNLPVPPKIPDGERVDFDIHRKRMEKDLNELQALIEAHFENRKKKEEELVSLKDRERR        |     |           |             |           |    |    |   | 125 | P45379-7  | TNNT2_HUMAN |
| 70  | EEKPKPRSFMPNLPVPPKIPDGERVDFDIHRKRMEKDLNELQALIEAHFENRKKKEEELVSLKDRERR        |     |           |             |           |    |    |   | 139 | P45379-3  | TNNT2_HUMAN |
| 71  | EEKPKPRSFMPNLPVPPKIPDGERVDFDIHRKRMEKDLNELQALIEAHFENRKKKEEELVSLKDRERR        |     |           |             |           |    |    |   | 140 | P45379-10 | TNNT2_HUMAN |
| 69  | EEKPKPRSFMPNLPVPPKIPDGERVDFDIHRKRMEKDLNELQALIEAHFENRKKKEEELVSLKDRERR        |     |           |             |           |    |    |   | 138 | P45379-4  | TNNT2_HUMAN |
| 66  | EEKPKPRSFMPNLPVPPKIPDGERVDFDIHRKRMEKDLNELQALIEAHFENRKKKEEELVSLKDRERR        |     |           |             |           |    |    |   | 135 | P45379-8  | TNNT2_HUMAN |
| 71  | EEKPKPRSFMPNLPVPPKIPDGERVDFDIHRKRMEKDLNELQALIEAHFENRKKKEEELVSLKDRERR        |     |           |             |           |    |    |   | 140 | P45379-5  | TNNT2_HUMAN |
| 71  | EEKPKPRSFMPNLPVPPKIPDGERVDF-----ERR                                         |     |           |             |           |    |    |   | 101 | P45379-9  | TNNT2_HUMAN |
|     |                                                                             | 11  |           | 12          |           | 13 | 14 |   |     |           |             |
| 141 | RAERAEQQRIRNREKERQNLAEERARREEEENRRKAEDARKKKKALSNNMHFGGYIQKQAQTERKSGK        |     |           |             |           |    |    |   | 210 | P45379    | TNNT2_HUMAN |
| 131 | RAERAEQQRIRNREKERQNLAEERARREEEENRRKAEDARKKKKALSNNMHFGGYIQKQAQTERKSGK        |     |           |             |           |    |    |   | 200 | P45379-6  | TNNT2_HUMAN |
| 140 | RAERAEQQRIRNREKERQNLAEERARREEEENRRKAEDARKKKKALSNNMHFGGYIQKQAQTERKSGK        |     |           |             |           |    |    |   | 209 | P45379-2  | TNNT2_HUMAN |
| 126 | RAERAEQQRIRNREKERQNLAEERARREEEENRRKAEDARKKKKALSNNMHFGGYIQKQAQTERKSGK        |     |           |             |           |    |    |   | 195 | P45379-7  | TNNT2_HUMAN |
| 140 | RAERAEQQRIRNREKERQNLAEERARREEEENRRKAEDARKKKKALSNNMHFGGYIQKQAQTERKSGK        |     |           |             |           |    |    |   | 209 | P45379-3  | TNNT2_HUMAN |
| 141 | RAERAEQQRIRNREKERQNLAEERARREEEENRRKAEDARKKKKALSNNMHFGGYIQK---TERKSGK        |     |           |             |           |    |    |   | 207 | P45379-10 | TNNT2_HUMAN |
| 139 | RAERAEQQRIRNREKERQNLAEERARREEEENRRKAEDARKKKKALSNNMHFGGYIQKQAQTERKSGK        |     |           |             |           |    |    |   | 208 | P45379-4  | TNNT2_HUMAN |
| 136 | RAERAEQQRIRNREKERQNLAEERARREEEENRRKAEDARKKKKALSNNMHFGGYIQKQAQTERKSGK        |     |           |             |           |    |    |   | 205 | P45379-8  | TNNT2_HUMAN |
| 141 | RAERAEQQRIRNREKERQNLAEERARREEEENRRKAEDARKKKKALSNNMHFGGYIQK-AQTERKSGK        |     |           |             |           |    |    |   | 209 | P45379-5  | TNNT2_HUMAN |
| 102 | RAERAEQQRIRNREKERQNLAEERARREEEENRRKAEDARKKKKALSNNMHFGGYIQKQAQTERKSGK        |     |           |             |           |    |    |   | 171 | P45379-9  | TNNT2_HUMAN |
|     |                                                                             | 14  |           | 15          |           | 16 |    |   |     |           |             |
| 211 | RQTEREKKKKILAERRKVLADIDLNEDQLREKAKELWQSIYNLEAEKFDLQEKFKQKQYIEINVLNRIND      |     |           |             |           |    |    |   | 280 | P45379    | TNNT2_HUMAN |
| 201 | RQTEREKKKKILAERRKVLADIDLNEDQLREKAKELWQSIYNLEAEKFDLQEKFKQKQYIEINVLNRIND      |     |           |             |           |    |    |   | 270 | P45379-6  | TNNT2_HUMAN |
| 210 | RQTEREKKKKILAERRKVLADIDLNEDQLREKAKELWQSIYNLEAEKFDLQEKFKQKQYIEINVLNRIND      |     |           |             |           |    |    |   | 279 | P45379-2  | TNNT2_HUMAN |
| 196 | RQTEREKKKKILAERRKVLADIDLNEDQLREKAKELWQSIYNLEAEKFDLQEKFKQKQYIEINVLNRIND      |     |           |             |           |    |    |   | 265 | P45379-7  | TNNT2_HUMAN |
| 210 | RQTEREKKKKILAERRKVLADIDLNEDQLREKAKELWQSIYNLEAEKFDLQEKFKQKQYIEINVLNRIND      |     |           |             |           |    |    |   | 279 | P45379-3  | TNNT2_HUMAN |
| 208 | RQTEREKKKKILAERRKVLADIDLNEDQLREKAKELWQSIYNLEAEKFDLQEKFKQKQYIEINVLNRIND      |     |           |             |           |    |    |   | 277 | P45379-10 | TNNT2_HUMAN |
| 209 | RQTEREKKKKILAERRKVLADIDLNEDQLREKAKELWQSIYNLEAEKFDLQEKFKQKQYIEINVLNRIND      |     |           |             |           |    |    |   | 278 | P45379-4  | TNNT2_HUMAN |
| 206 | RQTEREKKKKILAERRKVLADIDLNEDQLREKAKELWQSIYNLEAEKFDLQEKFKQKQYIEINVLNRIND      |     |           |             |           |    |    |   | 275 | P45379-8  | TNNT2_HUMAN |
| 210 | RQTEREKKKKILAERRKVLADIDLNEDQLREKAKELWQSIYNLEAEKFDLQEKFKQKQYIEINVLNRIND      |     |           |             |           |    |    |   | 279 | P45379-5  | TNNT2_HUMAN |
| 172 | RQTEREKKKKILAERRKVLADIDLNEDQLREKAKELWQSIYNLEAEKFDLQEKFKQKQYIEINVLNRIND      |     |           |             |           |    |    |   | 241 | P45379-9  | TNNT2_HUMAN |
|     |                                                                             | 16  |           | 17          |           |    |    |   |     |           |             |
| 281 | NQKVSCTRKGAKVTGRWK                                                          | 298 | P45379    | TNNT2_HUMAN |           |    |    |   |     |           |             |
| 271 | NQKVSCTRKGAKVTGRWK                                                          | 288 | P45379-6  | TNNT2_HUMAN |           |    |    |   |     |           |             |
| 280 | NQKVSCTRKGAKVTGRWK                                                          | 297 | P45379-2  | TNNT2_HUMAN |           |    |    |   |     |           |             |
| 266 | NQKVSCTRKGAKVTGRWK                                                          | 283 | P45379-7  | TNNT2_HUMAN |           |    |    |   |     |           |             |
| 280 | NQKVSCTRKGAKVTGRWK                                                          | 297 | P45379-3  | TNNT2_HUMAN |           |    |    |   |     |           |             |
| 278 | NQKVSCTRKGAKVTGRWK                                                          | 295 | P45379-10 | TNNT2_HUMAN |           |    |    |   |     |           |             |
| 279 | NQKVSCTRKGAKVTGRWK                                                          | 296 | P45379-4  | TNNT2_HUMAN |           |    |    |   |     |           |             |
| 276 | NQKVSCTRKGAKVTGRWK                                                          | 293 | P45379-8  | TNNT2_HUMAN |           |    |    |   |     |           |             |
| 280 | NQKVSCTRKGAKVTGRWK                                                          | 297 | P45379-5  | TNNT2_HUMAN |           |    |    |   |     |           |             |
| 242 | NQKVSCTRKGAKVTGRWK                                                          | 259 | P45379-9  | TNNT2_HUMAN |           |    |    |   |     |           |             |

**Figure S1. Amino acid sequence alignment of multiple hcTnT isoforms.** Sequences were retrieved from UniProtKB/Swiss-Prot database. Isoform 1, accession number P45379 or P45379-1, also known as TNT, which has been chosen as the ‘canonical’ sequence; Isoform 2, P45379-2; Isoform 3, P45379-3; Isoform 4, P45379-4; Isoform 5, P45379-5; Isoform 6, P45379-6 also known as TNT3; Isoform 7, P45379-7, also known as TNT4; Isoform 8, P45379-8, also known as TNT2; Isoform 9, P45379-9; Isoform 10, P45379-10. Exon numbers and boundaries are indicated. Shaded areas indicate the conserved sequence regions.

|         | <u>Exon</u> | <u>2</u>                                                     | <u>3</u>    | <u>4</u>                          | <u>5 (Fetal)</u> | <u>6</u> | <u>7</u> |     |
|---------|-------------|--------------------------------------------------------------|-------------|-----------------------------------|------------------|----------|----------|-----|
| mcTnT_D |             | SDAEEVVEEYEEEEQEEAVE                                         | -----       | EQEEAVEEEEEAGGAEPEPEGEAEETEEANVEE |                  |          |          | 50  |
| mcTnT   |             | SDAEEVVEEYEEEEQEEAVE                                         | -----       | EQEEAVEEEEEAGGAEPEPEGEAEETEEANVEE |                  |          |          | 46  |
| mcTnT_F |             | SDAEEVVEEYEEEEQEEAVE                                         | -----       | EQEEAVEEEEEAGGAEPEPEGEAEETEEANVEE |                  |          |          | 46  |
| mcTnT_A |             | SDAEEVVEEYEEEEQEEAVE                                         | EEEDWSEEEED | EQEEAVEEEEEAGGAEPEPEGEAEETEEANVEE |                  |          |          | 60  |
| mcTnT_c |             | SDAEEVVEEYEEEEQEEAVE                                         | EEEDWSEEEED | EQEEAVEEEEEAGGAEPEPEGEAEETEEANVEE |                  |          |          | 56  |
| mcTnT_B |             | SDAEEVVEEYEEEEQEEAVE                                         | EEEDWSEEEED | EQEEAVEEEEEAGGAEPEPEGEAEETEEANVEE |                  |          |          | 56  |
|         |             | <u>7</u>                                                     | <u>8</u>    | <u>9</u>                          | <u>10</u>        |          |          |     |
| mcTnT_D |             | VGPDEEAKDAEEGPVEDTKPKPSRLFMPNLVPPKIPDGERVDFDDIHRKRVEKDLNELQT |             |                                   |                  |          |          | 110 |
| mcTnT   |             | VGPDEEAKDAEEGPVEDTKPKPSRLFMPNLVPPKIPDGERVDFDDIHRKRVEKDLNELQT |             |                                   |                  |          |          | 106 |
| mcTnT_F |             | VGPDEEAKDAEEGPVEDTKPKPSRLFMPNLVPPKIPDGERVDFDDIHRKRVEKDLNELQT |             |                                   |                  |          |          | 106 |
| mcTnT_A |             | VGPDEEAKDAEEGPVEDTKPKPSRLFMPNLVPPKIPDGERVDFDDIHRKRVEKDLNELQT |             |                                   |                  |          |          | 120 |
| mcTnT_c |             | VGPDEEAKDAEEGPVEDTKPKPSRLFMPNLVPPKIPDGERVDFDDIHRKRVEKDLNELQT |             |                                   |                  |          |          | 116 |
| mcTnT_B |             | VGPDEEAKDAEEGPVEDTKPKPSRLFMPNLVPPKIPDGERVDFDDIHRKRVEKDLNELQT |             |                                   |                  |          |          | 116 |
|         |             | <u>10</u>                                                    | <u>11</u>   | <u>12</u>                         |                  |          |          |     |
| mcTnT_D |             | LIEAHFENRKKKEEELISLKDRIEKRAERAQQQIRNREKERQNRLAEERARREEEN     |             |                                   |                  |          |          | 170 |
| mcTnT   |             | LIEAHFENRKKKEEELISLKDRIEKRAERAQQQIRNREKERQNRLAEERARREEEN     |             |                                   |                  |          |          | 166 |
| mcTnT_F |             | LIEAHFENRKKKEEELISLKDRIEKRAERAQQQIRNREKERQNRLAEERARREEEN     |             |                                   |                  |          |          | 166 |
| mcTnT_A |             | LIEAHFENRKKKEEELISLKDRIEKRAERAQQQIRNREKERQNRLAEERARREEEN     |             |                                   |                  |          |          | 180 |
| mcTnT_c |             | LIEAHFENRKKKEEELISLKDRIEKRAERAQQQIRNREKERQNRLAEERARREEEN     |             |                                   |                  |          |          | 176 |
| mcTnT_B |             | LIEAHFENRKKKEEELISLKDRIEKRAERAQQQIRNREKERQNRLAEERARREEEN     |             |                                   |                  |          |          | 176 |
|         |             | <u>12</u>                                                    | <u>13</u>   | <u>14</u>                         |                  |          |          |     |
| mcTnT_D |             | RRKADEARKKKALSNMMHFGGYIQKQAQTERKSGKRQTEREKKKKILAEERRKALAIIDL |             |                                   |                  |          |          | 230 |
| mcTnT   |             | RRKADEARKKKALSNMMHFGGYIQKQAQTERKSGKRQTEREKKKKILAEERRKALAIIDL |             |                                   |                  |          |          | 226 |
| mcTnT_F |             | RRKADEARKKKALSNMMHFGGYIQKQAQTERKSGKRQTEREKKKKILAEERRKALAIIDL |             |                                   |                  |          |          | 223 |
| mcTnT_A |             | RRKADEARKKKALSNMMHFGGYIQKQAQTERKSGKRQTEREKKKKILAEERRKALAIIDL |             |                                   |                  |          |          | 237 |
| mcTnT_c |             | RRKADEARKKKALSNMMHFGGYIQKQAQTERKSGKRQTEREKKKKILAEERRKALAIIDL |             |                                   |                  |          |          | 233 |
| mcTnT_B |             | RRKADEARKKKALSNMMHFGGYIQKQAQTERKSGKRQTEREKKKKILAEERRKALAIIDL |             |                                   |                  |          |          | 236 |
|         |             | <u>14</u>                                                    | <u>15</u>   | <u>16</u>                         | <u>17</u>        |          |          |     |
| mcTnT_D |             | NEDQLREKAKELWQSIHNLEAEKFDLQEKFKQQKYEINVLNRINDNQKVS KTRGKAKVT |             |                                   |                  |          |          | 290 |
| mcTnT   |             | NEDQLREKAKELWQSIHNLEAEKFDLQEKFKQQKYEINVLNRINDNQKVS KTRGKAKVT |             |                                   |                  |          |          | 286 |
| mcTnT_F |             | NEDQLREKAKELWQSIHNLEAEKFDLQEKFKQQKYEINVLNRINDNQKVS KTRGKAKVT |             |                                   |                  |          |          | 283 |
| mcTnT_A |             | NEDQLREKAKELWQSIHNLEAEKFDLQEKFKQQKYEINVLNRINDNQKVS KTRGKAKVT |             |                                   |                  |          |          | 297 |
| mcTnT_c |             | NEDQLREKAKELWQSIHNLEAEKFDLQEKFKQQKYEINVLNRINDNQKVS KTRGKAKVT |             |                                   |                  |          |          | 293 |
| mcTnT_B |             | NEDQLREKAKELWQSIHNLEAEKFDLQEKFKQQKYEINVLNRINDNQKVS KTRGKAKVT |             |                                   |                  |          |          | 296 |
|         |             | <u>17</u>                                                    |             |                                   |                  |          |          |     |
| mcTnT_D |             | GRWK                                                         | 294         |                                   |                  |          |          |     |
| mcTnT   |             | GRWK                                                         | 290         |                                   |                  |          |          |     |
| mcTnT_F |             | GRWK                                                         | 287         |                                   |                  |          |          |     |
| mcTnT_A |             | GRWK                                                         | 301         |                                   |                  |          |          |     |
| mcTnT_c |             | GRWK                                                         | 297         |                                   |                  |          |          |     |
| mcTnT_B |             | GRWK                                                         | 300         |                                   |                  |          |          |     |

**Figure S2. Sequence alignment of multiple mouse cTnT isoforms.** Sequences were retrieved from NCBI database. The mcTnT isoforms D, E, F, A, C, and B were denoted as mcTnT\_D, mcTnT, mcTnT\_F, mcTnT\_A, mcTnT\_C and mcTnT\_B respectively. Isoforms D, E, and F also correspond to P50752-4 (isoform A1), P50752-3 (isoform A2), and P50752-2 (isoform A3B) of mouse cTnT in UniProtKB/Swiss-Prot database. Exon numbers and boundaries are indicated. Shaded areas indicate the conserved sequence regions.

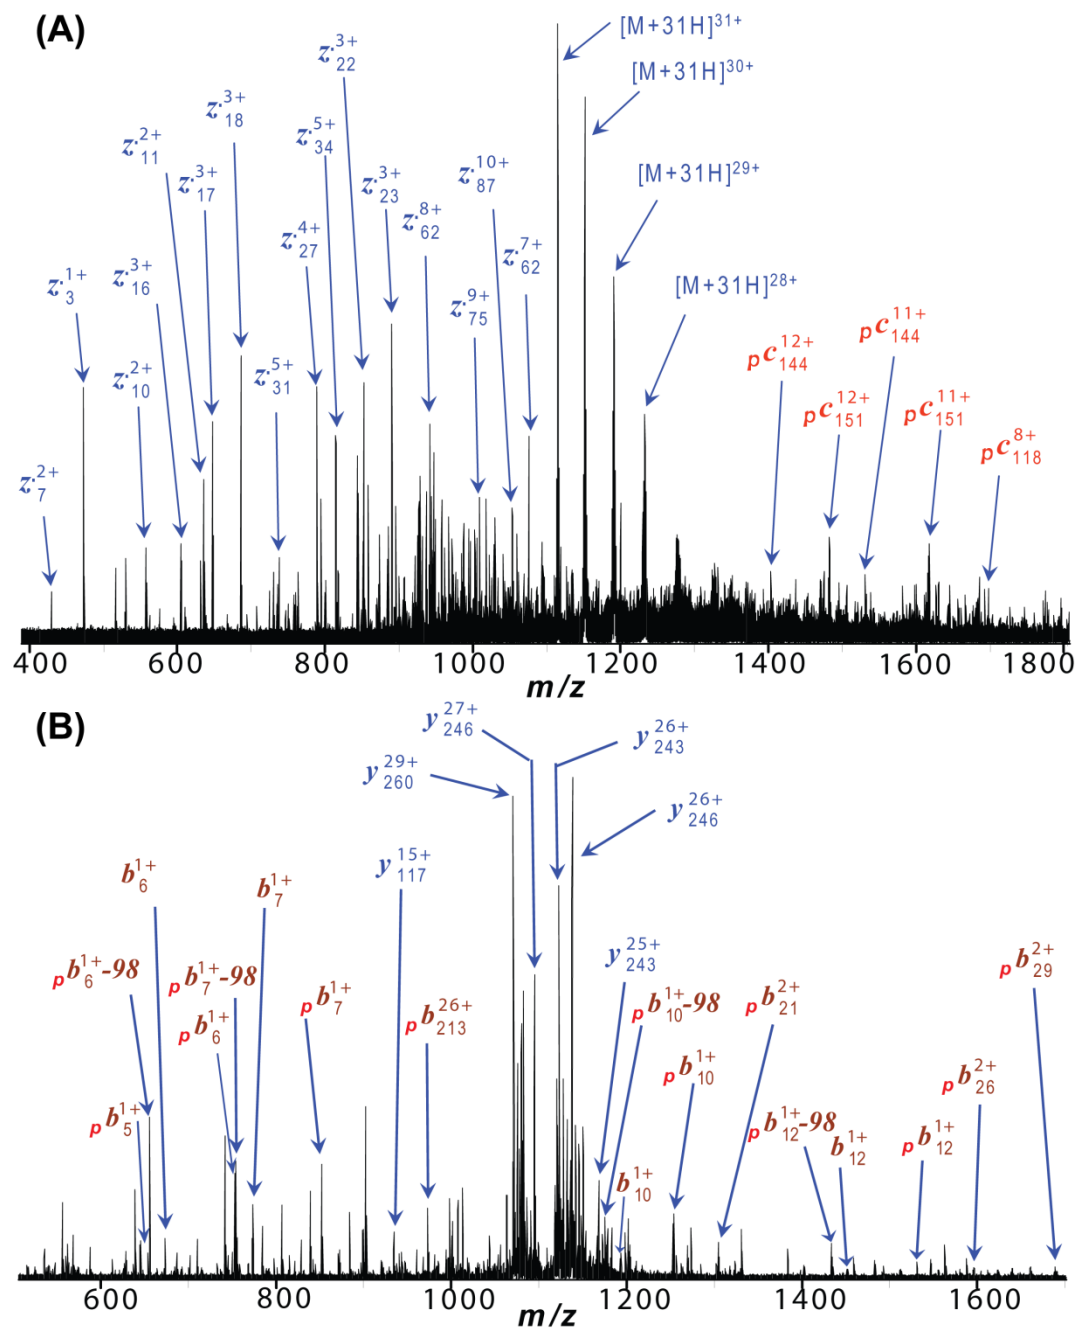

**Figure S3. Representative MS/MS spectra of phosphorylated mcTnT for determination of phosphorylation site in mouse heart samples.** (A) ECD spectrum of mouse  $pc$ TnT; No neutral loss of phosphate moiety is detected. (B) CAD spectrum of mouse  $pc$ TnT. Subscript  $p$  stands for product ions carrying phosphorylation. Neutral loss of phosphate moiety is evident. -98 indicates the loss of  $H_3PO_4$  (-98 Da). Note that the masses of  $b$  ions (e.g.  $b_6$ ) equal to those with the loss of  $HPO_3$  (-80 Da) from their phosphorylated counterparts (e.g.  $pb_6$ ).

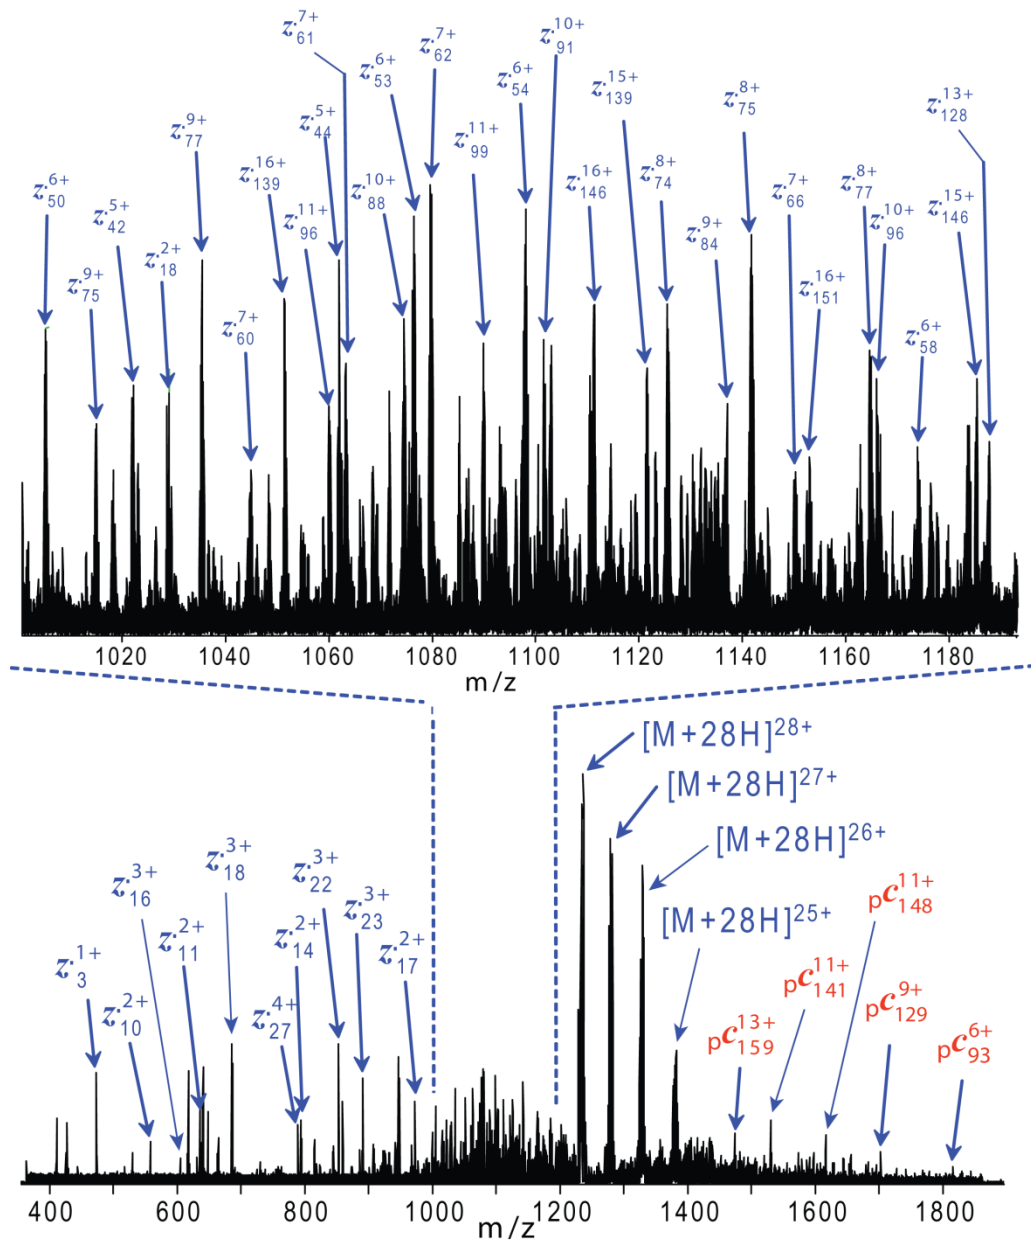

**Figure S4. Representative ECD spectra of  $p,hcTnT$  for determination of phosphorylation site in  $cTnT$  purified from normal human heart samples. No neutral loss of phosphate moiety is detected.**



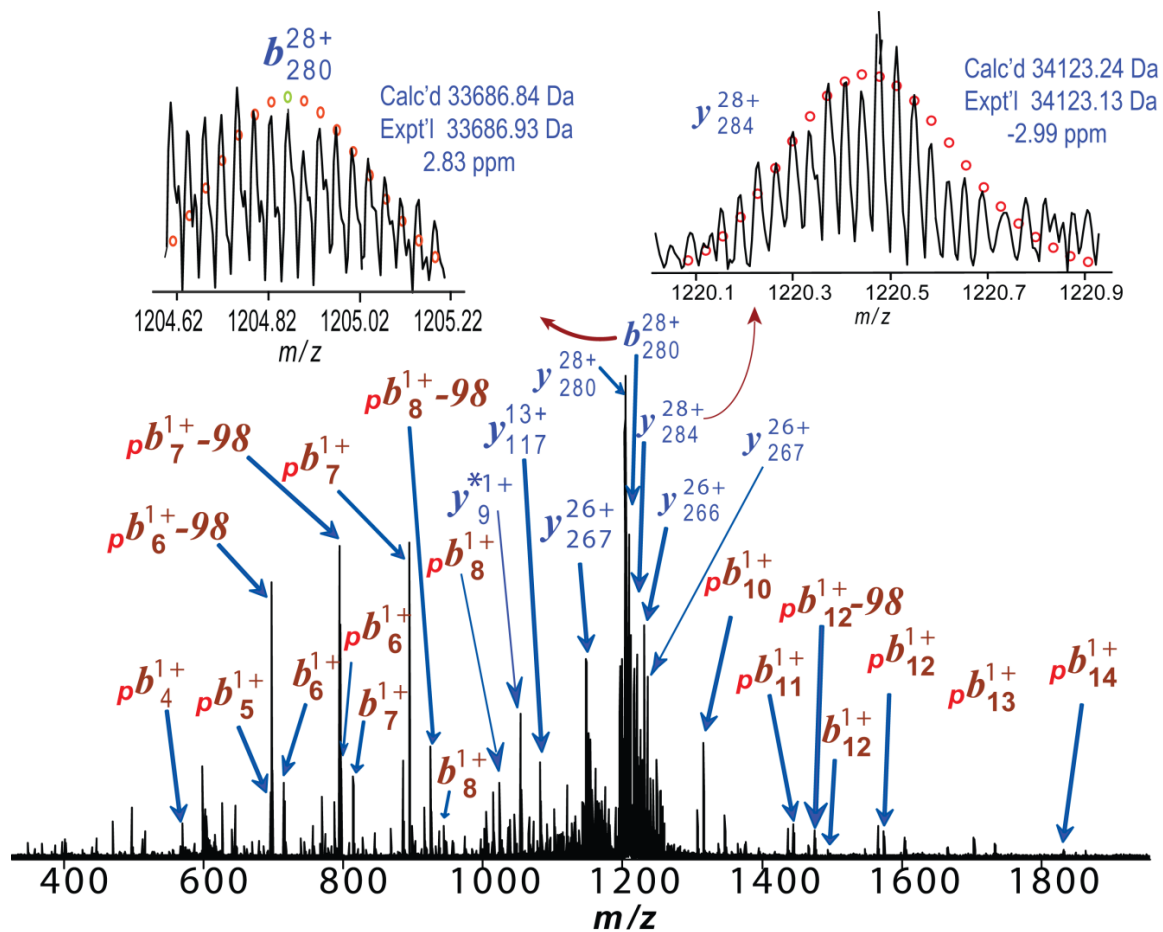

**Figure S5. Representative CAD spectra of  $p_{hc}TnT$  for determination of phosphorylation site in  $cTnT$  purified from normal human heart samples.** Neutral loss of phosphate moiety is evident. -98 indicates the loss of  $H_3PO_4$  (-98 Da). Note that the masses of  $b$  ions (e.g.  $b_6$ ) equal to those with the loss of  $HPO_3$  (-80 Da) from their phosphorylated counterparts (e.g.  $p_b_6$ ).
